# Supplementary material for: Specific binding of GPR174 by endogenous lysophosphatidylserine leads to high constitutive Gs signaling
Source: PubMed Central journal article supplement (PMC10516915; doi:10.1038/s41467-023-41654-3), 2023-09-22
Supplement: 41467_2023_41654_MOESM3_ESM.pdf [file 41467_2023_41654_MOESM3_ESM.pdf]

## Reporting Summary

Nature Portfolio wishes to improve the reproducibility of the work that we publish. This form provides structure for consistency and transparency in reporting. For further information on Nature Portfolio policies, see our [Editorial Policies](#) and the [Editorial Policy Checklist](#).

### Statistics

For all statistical analyses, confirm that the following items are present in the figure legend, table legend, main text, or Methods section.

n/a Confirmed

- The exact sample size ( $n$ ) for each experimental group/condition, given as a discrete number and unit of measurement
- A statement on whether measurements were taken from distinct samples or whether the same sample was measured repeatedly
- The statistical test(s) used AND whether they are one- or two-sided  
*Only common tests should be described solely by name; describe more complex techniques in the Methods section.*
- A description of all covariates tested
- A description of any assumptions or corrections, such as tests of normality and adjustment for multiple comparisons
- A full description of the statistical parameters including central tendency (e.g. means) or other basic estimates (e.g. regression coefficient) AND variation (e.g. standard deviation) or associated estimates of uncertainty (e.g. confidence intervals)
- For null hypothesis testing, the test statistic (e.g.  $F$ ,  $t$ ,  $r$ ) with confidence intervals, effect sizes, degrees of freedom and  $P$  value noted  
*Give  $P$  values as exact values whenever suitable.*
- For Bayesian analysis, information on the choice of priors and Markov chain Monte Carlo settings
- For hierarchical and complex designs, identification of the appropriate level for tests and full reporting of outcomes
- Estimates of effect sizes (e.g. Cohen's  $d$ , Pearson's  $r$ ), indicating how they were calculated

*Our web collection on [statistics for biologists](#) contains articles on many of the points above.*

### Software and code

Policy information about [availability of computer code](#)

**Data collection** cryoEM data was collected on Titan Krios G3 with detector Gatan or Falcon 4. Luminescent signal of NanoBit and cAMP accumulation assay were read in Tecan, Spark.

**Data analysis** softwares applied for analysis were listed as: MotionCor2, cryoSPARC3.0, cryoSPARC3.3.1, Coot 0.9 pre, Graphpad Prism 7.0, Pymol 2.5.2, FlowJo 10, CHARMM36@CGenFF 2.5.1, GROMACS2021.4.

For manuscripts utilizing custom algorithms or software that are central to the research but not yet described in published literature, software must be made available to editors and reviewers. We strongly encourage code deposition in a community repository (e.g. GitHub). See the Nature Portfolio [guidelines for submitting code & software](#) for further information.

### Data

Policy information about [availability of data](#)

All manuscripts must include a [data availability statement](#). This statement should provide the following information, where applicable:

- Accession codes, unique identifiers, or web links for publicly available datasets
- A description of any restrictions on data availability
- For clinical datasets or third party data, please ensure that the statement adheres to our [policy](#)

The atomic structures have been deposited at the Protein Data Bank (PDB) under the accession codes 8KGK , 8KH4 and 8KH5. The EM maps have been deposited at the Electron Microscopy Data Bank (EMDB) under the accession numbers EMD-37224 , EMD-37236 and EMD-37237 . Source data are provided with this paper.

## Research involving human participants, their data, or biological material

Policy information about studies with [human participants or human data](#). See also policy information about [sex, gender \(identity/presentation\), and sexual orientation](#) and [race, ethnicity and racism](#).

|                                                                    |                |
|--------------------------------------------------------------------|----------------|
| Reporting on sex and gender                                        | not applicable |
| Reporting on race, ethnicity, or other socially relevant groupings | not applicable |
| Population characteristics                                         | not applicable |
| Recruitment                                                        | not applicable |
| Ethics oversight                                                   | not applicable |

Note that full information on the approval of the study protocol must also be provided in the manuscript.

## Field-specific reporting

Please select the one below that is the best fit for your research. If you are not sure, read the appropriate sections before making your selection.

Life sciences       Behavioural & social sciences       Ecological, evolutionary & environmental sciences

For a reference copy of the document with all sections, see [nature.com/documents/nr-reporting-summary-flat.pdf](https://www.nature.com/documents/nr-reporting-summary-flat.pdf)

## Life sciences study design

All studies must disclose on these points even when the disclosure is negative.

|                 |                                                                                                                                                                                                                                                                                                                                                                                                                                                                                                                                                                                                                                                                                                                                                                                                                                                                                                                                                                                                                                                                                                                                                                                                                                                                                                                                                                                                             |
|-----------------|-------------------------------------------------------------------------------------------------------------------------------------------------------------------------------------------------------------------------------------------------------------------------------------------------------------------------------------------------------------------------------------------------------------------------------------------------------------------------------------------------------------------------------------------------------------------------------------------------------------------------------------------------------------------------------------------------------------------------------------------------------------------------------------------------------------------------------------------------------------------------------------------------------------------------------------------------------------------------------------------------------------------------------------------------------------------------------------------------------------------------------------------------------------------------------------------------------------------------------------------------------------------------------------------------------------------------------------------------------------------------------------------------------------|
| Sample size     | For structural information, 2943 movies of GPR174-Gs, 1058 movies of GPR161, and 923 movies of GPR61 were collected and analyzed as described in Methods.<br>For cell-based functional verification, NanoBit-based miniG recruitment assay, cAMP accumulation assay and NanoBit Gs recruitment assay, at least three biological experiments were performed. Data were recorded and analyzed by fitting non-linear regression (dose-stimulation or dose-inhibition, three parameters) in GraphPad Prism 7.0. For cryo-EM structure determination, sample sizes were determined by the number of particles on EM grids sufficient to obtain an atomic structure. For cell-based assays, three independent measurements are enough to get a reasonable comparison, to draw a firm conclusion. And sample sizes were determined based on the literature review and the number of independent experiments required for meaningful conclusions.<br>For cryo-EM structure determination, 807893, 427864 and 192672 particles were used to generate the final density map of GPR174-Gs, GPR161-Gs and GPR61-Gs complex, and result in a resolution of 2.83 Å, 3.10 Å and 3.16 Å, which is enough for atomic model building. For cell-based assay, for cell-based assays, sample sizes were determined based on the literature review and the number of independent experiments required for meaningful conclusions. |
| Data exclusions | No data were excluded from the analyses.                                                                                                                                                                                                                                                                                                                                                                                                                                                                                                                                                                                                                                                                                                                                                                                                                                                                                                                                                                                                                                                                                                                                                                                                                                                                                                                                                                    |
| Replication     | Each experiment was reproduced at least three times on separate occasions. Experimental findings were reliably reproduced.                                                                                                                                                                                                                                                                                                                                                                                                                                                                                                                                                                                                                                                                                                                                                                                                                                                                                                                                                                                                                                                                                                                                                                                                                                                                                  |
| Randomization   | The conclusion drawn from structure analysis and cell assay is not influenced by randomization of experiment, so samples were not randomized for the experiments.                                                                                                                                                                                                                                                                                                                                                                                                                                                                                                                                                                                                                                                                                                                                                                                                                                                                                                                                                                                                                                                                                                                                                                                                                                           |
| Blinding        | The conclusion drawn from structure analysis and cell assay is not influenced by the subjective judgment of the researchers, so no blinding was used in this study.                                                                                                                                                                                                                                                                                                                                                                                                                                                                                                                                                                                                                                                                                                                                                                                                                                                                                                                                                                                                                                                                                                                                                                                                                                         |

## Reporting for specific materials, systems and methods

We require information from authors about some types of materials, experimental systems and methods used in many studies. Here, indicate whether each material, system or method listed is relevant to your study. If you are not sure if a list item applies to your research, read the appropriate section before selecting a response.

## Materials &amp; experimental systems

## Methods

| n/a                                 | Involvement                                               |
|-------------------------------------|-----------------------------------------------------------|
| <input type="checkbox"/>            | <input checked="" type="checkbox"/> Involved in the study |
| <input type="checkbox"/>            | <input checked="" type="checkbox"/> Antibodies            |
| <input type="checkbox"/>            | <input checked="" type="checkbox"/> Eukaryotic cell lines |
| <input checked="" type="checkbox"/> | <input type="checkbox"/> Palaeontology and archaeology    |
| <input checked="" type="checkbox"/> | <input type="checkbox"/> Animals and other organisms      |
| <input checked="" type="checkbox"/> | <input type="checkbox"/> Clinical data                    |
| <input checked="" type="checkbox"/> | <input type="checkbox"/> Dual use research of concern     |
| <input checked="" type="checkbox"/> | <input type="checkbox"/> Plants                           |

| n/a                                 | Involvement                                     |
|-------------------------------------|-------------------------------------------------|
| <input checked="" type="checkbox"/> | <input type="checkbox"/> Involved in the study  |
| <input checked="" type="checkbox"/> | <input type="checkbox"/> ChIP-seq               |
| <input checked="" type="checkbox"/> | <input type="checkbox"/> Flow cytometry         |
| <input checked="" type="checkbox"/> | <input type="checkbox"/> MRI-based neuroimaging |

## Antibodies

|                 |                                                                                                                                                                                       |
|-----------------|---------------------------------------------------------------------------------------------------------------------------------------------------------------------------------------|
| Antibodies used | M1 flag antibody used for agarose affinity purification were produced from hybridoma cell line. M2-Flag antibody (A8592) and anti $\alpha$ -Tubulin antibody (T6074) were from Sigma. |
| Validation      | The M1 flag antibody has been used in multiple studies. <a href="https://www.sigmaaldrich.cn/CN/zh/product/sigma/f3040">https://www.sigmaaldrich.cn/CN/zh/product/sigma/f3040</a>     |

## Eukaryotic cell lines

Policy information about [cell lines and Sex and Gender in Research](#)

|                                                                      |                                                                                                                                                                                  |
|----------------------------------------------------------------------|----------------------------------------------------------------------------------------------------------------------------------------------------------------------------------|
| Cell line source(s)                                                  | Expi293F cells were purchased from Thermo Fisher Scientific. CHO and HeLa cells were gift from Guotai Xu's Lab in NIBS. Sf9 insect cell was acquired from Expression System Inc. |
| Authentication                                                       | All those cell lines were maintained by the supplier, no more authentication was performed by the authors.                                                                       |
| Mycoplasma contamination                                             | All cell lines mentioned were netative for Mycoplasma contamination.                                                                                                             |
| Commonly misidentified lines<br>(See <a href="#">ICLAC</a> register) | No commonly misidentified cell lines were used in this study.                                                                                                                    |
